# Supplementary material
Source: PubMed Central journal article supplement (PMC8478784)
Supplement: NIHMS1712530-supplement-Supplemental_Table_1.pdf [file NIHMS1712530-supplement-Supplemental_Table_1.pdf]

| Test           | Unit | V:3    | V:4    | Reference Range                                                   |
|----------------|------|--------|--------|-------------------------------------------------------------------|
| Total WBC      | /μL  | 7620   | 10920  | 4000-10500                                                        |
| Total RBC      | m/μL | 5.47   | 4.74   | 3.8-5.8                                                           |
| Hemoglobin     | g/dL | 14.2   | 12.8   | 12.0-15.0                                                         |
| HCT            | %    | 40.6   | 37.2   | 35-45                                                             |
| MCV            | fL   | 74.2   | 78.5   | 78-95                                                             |
| MCH            | pg   | 26     | 27     | 26-32                                                             |
| MCHC           | g/dL | 35     | 34.4   | 32-36                                                             |
| Platelet Count | /μL  | 403000 | 479000 | 150000-400000                                                     |
| Neutrophils    | %    | 32     | 49     | 50-60                                                             |
| Lymphocytes    | %    | 54     | 34     | 35-40                                                             |
| Monocytes      | %    | 11     | 9      | 1-4                                                               |
| Eosinophils    | %    | 3      | 8      | 1-2                                                               |
| Basophil       | %    | 0      | 0      | 0-0.75                                                            |
| RDW            | %    | 12.7   | 13.5   | 11.5-14.0                                                         |
| MPV            | fL   | 9.8    | 8.6    | 6.8-10.2                                                          |
| HbA1C          | %    | 10.6   | 10.7   | <5.7% - Normal; 5.7-6.4%- Pre-diabetic; >= 6.5% Diabetes mellitus |
| D-Dimer        | mg/L | 0.29   | 0.15   | upto 0.50mg/L                                                     |

Liver Function Tests-

|                      |       |      |       |                               |
|----------------------|-------|------|-------|-------------------------------|
| SGOT (AST)           | U/L   | 22   | 11    | upto 32                       |
| SGPT (ALT)           | U/L   | 18   | 13    | upto 33                       |
| Alkaline Phosphatase | U/L   | 242  | 110   | Children: 11-15y upto 468 U/L |
| Total Bilirubin      | mg/dL | 0.37 | <0.15 | upto 1.2mg/dL                 |
| Direct Bilirubin     | mg/dL | 0.12 | <0.08 | upto 0.30                     |
| Gamma G.T            | U/L   | 15   | 13    | upto 40                       |
| Total Protein        | g/dL  | NA   | 7.4   | 6-8.5                         |
| Albumin              | g/dL  | NA   | 3.7   | 3.5-5                         |
| Globulins            | g/dL  | NA   | 3.7   | 1.8-3.2                       |
| Albumin:Globulins    |       | NA   | 1     | 1.2-2.2                       |
| tTG-IgA              | U/L   | NA   | 28    | upto 15                       |

Renal Function -

|            |       |    |     |         |
|------------|-------|----|-----|---------|
| Urea       | mg/dL | NA | 22  | 10-50   |
| Creatinine | mg/dL | NA | 0.5 | 0.5-1.5 |

Serum Electrolytes -

|             |        |    |     |         |
|-------------|--------|----|-----|---------|
| Sodium      | mmol/L | NA | 140 | 136-145 |
| Potassium   | mmol/L | NA | 3.7 | 3.5-5.4 |
| Chloride    | mmol/L | NA | 107 | 95-108  |
| Bicarbonate | mmol/L | NA | 21  | 21-32   |

HCT = Hematocrit

MCV= Mean corpuscular volume

MCH = Mean corpuscular hemoglobin

MCHC = Mean corpuscular hemoglobin concentration

RDW = Red cell distribution width

MPV = Mean platelet Volume

HbA1c = Hemoglobin A1c

SGOT (AST) = Serum glutamic-oxaloacetic transaminase (Aspartate transaminase)

SGPT (ALT) = Serum glutamic pyruvic transaminase (Alanine transaminase)

tTG-IgA = Tissue transglutaminase immunoglobulin A

NA = Not available
