# Supplementary material
Source: PubMed Central journal article supplement (PMC8478784)
Supplement: NIHMS1712530-supplement-Supplemental_table_2.pdf [file NIHMS1712530-supplement-Supplemental_table_2.pdf]

Homozygous regions in genotype data of all 6 members

| <b>Chr</b> | <b>hg19_start</b> | <b>hg19_end</b> | <b>Score</b> |
|------------|-------------------|-----------------|--------------|
| 3          | 9,091,946         | 22,694,778      | 750          |
| 7          | 37,213,483        | 45,963,114      | 750          |
| 7          | 106,157,161       | 130,629,493     | 750          |
| 10         | 54,832,274        | 82,452,030      | 750          |
| 11         | 69,052,682        | 70,374,786      | 661          |
